# Supplementary material for: Surrogate Adiposity Markers and Mortality
Source: PubMed Central journal article supplement (PMC10512100; doi:10.1001/jamanetworkopen.2023.34836), 2023-09-20
Supplement: jamanetwopen-e2334836-s001.pdf [file jamanetwopen-e2334836-s001.pdf]

## Supplemental Online Content

Khan I, Chong M, Le A, et al. Surrogate adiposity markers and mortality among White adults. *JAMA Netw Open*. 2023;6(9):e2334836. doi:10.1001/jamanetworkopen.2023.34836

**eTable 1.** Baseline Characteristics of Participants in the UKB

**eTable 2.** List of GWAS Consortia

**eMethods.** UKB Population and Extended Methods

**eTable 3.** BMI Association With Covariates

**eTable 4.** Phenotype and Mortality Outcome Definitions

**eTable 5.** Association of BMI, FMI, and WHR With BMI, FMI, and WHR PRS

**eFigure 1.** Association of BMI, FMI, and WHR With All-Cause Mortality in All UKB Participants (N = 387 672), Males (n = 177 340), and Females (n = 210 332)

**eFigure 2.** Association of BMI, FMI, and WHR With Cause-Specific Mortality Outcomes

**eTable 6.** Linear Mendelian Randomization Analyses Comparing the Association of Individual Genetically Determined Adiposity Measures With All-Cause Mortality Between Premenopausal vs Postmenopausal Females in the UKB

**eFigure 3.** Comparison Between Epidemiologically Derived and MR Derived Estimates for the BMI–All-Cause Mortality Association

**eFigure 4.** Comparison Between Epidemiologically Derived and MR-Derived Estimates for the FMI–All-Cause Mortality Association

**eFigure 5.** Comparison Between Epidemiologically Derived and MR-Derived Estimates for the WHR–All-Cause Mortality Association

**eTable 7.** Select Single Nucleotide Variants (SNVs) Associated With BMI

**eTable 8.** Select Single Nucleotide Variants (SNVs) Associated With FMI

**eTable 9.** Select Single Nucleotide Variants (SNVs) Associated With WHR

**eTable 10.** Egger Regression Mendelian Randomization Analyses

**eTable 11.** Inverse Variance Weighted Mendelian Randomization Analyses

**eTable 12.** Weighted Median Mendelian Randomization Analyses

**eTable 13.** Summary of Epidemiological and Linear Mendelian Randomization Analyses of Adiposity Measures and All-Cause Mortality: Full Adjusted Model

**eFigure 6.** Nonlinear Mendelian Randomization Analyses Comparing Genetically Determined Adiposity Measure–All-Cause Mortality Associations Across BMI Quantiles

**eFigure 7.** Epidemiological Association Between BMI, FMI, and WHR and All-Cause Mortality Across Age Groups

**eTable 14.** Summary of Epidemiological and Linear Mendelian Randomization Analyses of Adiposity Measures and All-Cause Mortality Across Age Groups

**eFigure 8.** Comparison Between Epidemiologically Derived and MR-Derived Estimates for the BMI–All-Cause Mortality Association Between Age Groups

**eFigure 9.** Comparison Between Epidemiologically Derived and MR-Derived Estimates for the FMI–All-Cause Mortality Association Between Age Groups

**eFigure 10.** Comparison Between Epidemiologically Derived and MR-Derived Estimates for the WHR–All-Cause Mortality Association Between Age Groups

**eTable 15.** Comparison Between the Cox Regression and Logistic Regression Model in the Adjusted Linear Mendelian Randomization Analysis

**eTable 16.** Comparison Between the Cox Regression and Logistic Regression Model in the Adjusted Observational Analysis

**eReferences.**

This supplemental material has been provided by the authors to give readers additional information about their work.

**eTable 1. Baseline Characteristics of Participants in the UKB**Whole UKB Population

| Baseline characteristics                                       | All UKB participants | All deaths  | Controls <sup>a</sup> |
|----------------------------------------------------------------|----------------------|-------------|-----------------------|
| Number of participants                                         | 387,672              | 25,297      | 362,375               |
| Total number of men                                            | 177,340              | 15,016      | 162,324               |
| Total number of women                                          | 210,332              | 10,281      | 200,051               |
| Mean (SD) age at baseline (years)                              | 56.9 (8.0)           | 61.8 (6.3)  | 56.6 (8.0)            |
| Mean (SD) body mass index (kg/m <sup>2</sup> )                 | 27.4 (4.6)           | 28.1 (5.1)  | 27.3 (4.6)            |
| Mean (SD) whole body fat mass (kg)                             | 24.8 (9.3)           | 25.6 (10.0) | 24.8 (9.3)            |
| Mean (SD) height (m)                                           | 1.69 (9.23)          | 1.69 (9.22) | 1.69 (9.23)           |
| Mean (SD) fat mass index (kg/m <sup>2</sup> )                  | 8.83 (3.55)          | 9.06 (3.74) | 8.82 (3.55)           |
| Mean (SD) waist-to-hip ratio                                   | 0.87 (0.1)           | 0.91 (0.1)  | 0.87 (0.1)            |
| Death due to cancer                                            | N/A                  | 9,732       | 377,940               |
| Death due to cardiovascular disease (CVD)                      | N/A                  | 4,231       | 383,441               |
| Death due to respiratory disease                               | N/A                  | 1,755       | 385,917               |
| Death due to non-cancer, CVD, or respiratory disease (“other”) | N/A                  | 4,653       | 383,019               |

<sup>a</sup>The pure control group, which excludes all mortality cases and controls matched to mortality cases.  
Case-Control Sample (i.e. The Testing or Validation Set)

| Baseline characteristics          | All UKB participants | All deaths    | Controls <sup>a</sup> |
|-----------------------------------|----------------------|---------------|-----------------------|
| Number of participants            | 50,594               | 25,297        | 25,297                |
| Percentage (%) of men             | 30,031 (59.3)        | 15,016 (59.3) | 15,015 (59.4)         |
| Mean (SD) age at baseline (years) | 61.6 (6.2)           | 61.8 (6.2)    | 61.3 (6.1)            |

|                                                                |             |             |             |
|----------------------------------------------------------------|-------------|-------------|-------------|
| Mean (SD) body mass index (kg/m <sup>2</sup> )                 | 27.9 (4.8)  | 28.2 (5.1)  | 27.6 (4.4)  |
| Mean (SD) whole body fat mass (kg)                             | 25.1 (9.5)  | 25.7 (10.0) | 24.5 (8.9)  |
| Mean (SD) height (m)                                           | 1.70 (9.19) | 1.69 (9.22) | 1.70 (9.16) |
| Mean (SD) fat mass index (kg/m <sup>2</sup> )                  | 8.83 (3.57) | 9.06 (3.74) | 8.61 (3.37) |
| Mean (SD) waist-to-hip ratio                                   | 0.90 (0.1)  | 0.91 (0.1)  | 0.89 (0.1)  |
| Death due to cancer                                            | N/A         | 9,732       | 40,862      |
| Death due to cardiovascular disease (CVD)                      | N/A         | 4,231       | 46,363      |
| Death due to respiratory disease                               | N/A         | 1,755       | 48,839      |
| Death due to non-cancer, CVD, or respiratory disease (“other”) | N/A         | 4,653       | 45,941      |

**eTable 2. List of GWAS Consortia**

| <b>Phenotype</b>         | <b>Consortia Name</b>                                               |
|--------------------------|---------------------------------------------------------------------|
| BMI                      | Genetic Investigation of ANthropometric Traits (GIANT) <sup>1</sup> |
| Waist-to-hip ratio (WHR) | Genetic Investigation of ANthropometric Traits (GIANT) <sup>1</sup> |

## eMethods. UKB Population and Extended Methods

### UKB Population

We used the UKB dataset issued on August 3rd, 2021 as part of approved application #15255. Samples were excluded based on criteria from the standard UKB genomic analysis exclusion list (i.e. UKB data showcase data-field #22010)<sup>13</sup>. Further quality control (QC) was also done: related samples, samples with discordant reported sex versus genetic sex, lacking British ancestry, and with QC failure in the UK BiLEVE array were removed<sup>13</sup>. SNPs that had low minor allele frequency (MAF < 0.01), low quality of imputation (INFOscore < 0.6), deviation from Hardy-Weinberg equilibrium/poor genotype calling (HWE;  $P < 10^{-6}$ ) or low call rates (< 99%) were removed<sup>13</sup>.

### Schematic representation of sample eligibility criteria and partitioning:

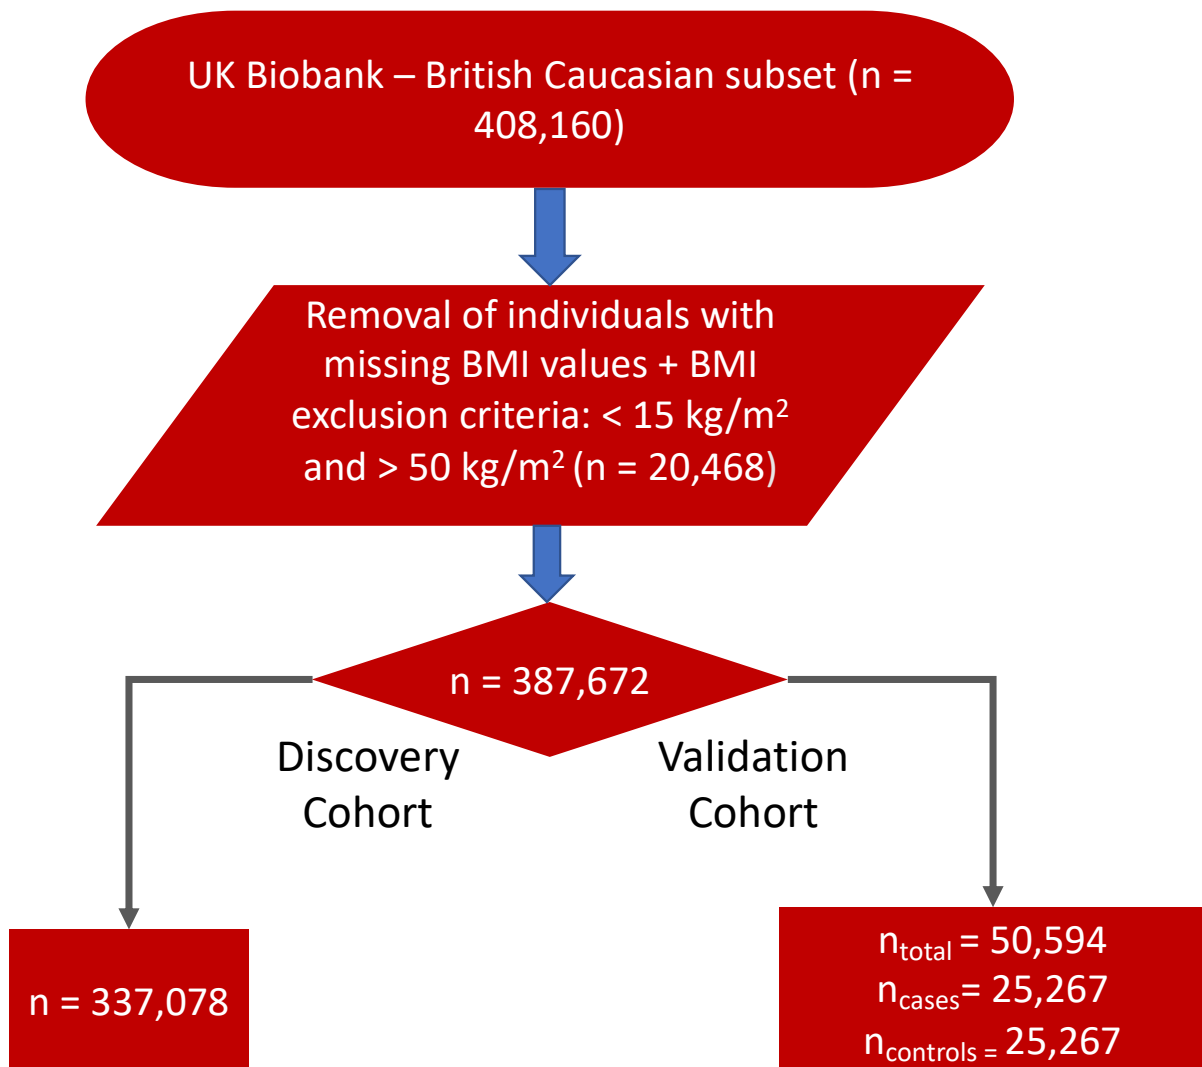

### UK Biobank-Based Genome-Wide Association Studies

REGENIE, a program that uses whole genome regression modelling to run GWAS analyses, was used to compute GWAS within a select subset of UKB participants for fat mass index (FMI or whole body fat mass/height<sup>2</sup>). REGENIE uses linear regression to assess the association between genetic variants and a given trait, after adjusting for age, age<sup>2</sup>, chip type, the first 40 genetic principal components, and UKB assessment centre, as described elsewhere<sup>9,19</sup>.

*Polygenic risk scores*

| <b>PRS</b> | <b>Number of SNPs included (at <math>p &lt; 0.01</math>)</b> |
|------------|--------------------------------------------------------------|
| BMI        | 834,633                                                      |
| FMI        | 772,784                                                      |
| WHR        | 602,314                                                      |

*Linkage disequilibrium pruning for mendelian randomization analyses*

PLINK was used to prune SNPs in linkage disequilibrium (LD) within a particular window. Our reference panel was the European 1000G panel<sup>17</sup>.

**eTable 3. BMI Association With Covariates<sup>a</sup>**

| <b>Covariate ~ BMI Association</b> | <b>β/OR</b> | <b>P value</b>                      | <b>Adjusted R-squared</b> |
|------------------------------------|-------------|-------------------------------------|---------------------------|
| Age ~ BMI                          | 0.01        | 0.09                                | $3.67 \times 10^{-5}$     |
| Sex ~ BMI                          | 0.02        | $1.03 \times 10^{-37}$ <sup>b</sup> | N/A                       |
| PC1 ~ BMI                          | -0.003      | 0.02 <sup>b</sup>                   | $8.11 \times 10^{-5}$     |
| PC2 ~ BMI                          | -0.0002     | 0.86                                | $-1.91 \times 10^{-5}$    |
| PC3 ~ BMI                          | -0.001      | 0.32                                | $-5.74 \times 10^{-7}$    |
| PC4 ~ BMI                          | 0.01        | 0.0005 <sup>b</sup>                 | 0.0002                    |
| PC5 ~ BMI                          | 0.03        | $5.42 \times 10^{-5}$ <sup>b</sup>  | 0.0003                    |
| PC6 ~ BMI                          | -0.003      | 0.05                                | $5.82 \times 10^{-5}$     |
| PC7 ~ BMI                          | 0.0006      | 0.69                                | $-1.67 \times 10^{-5}$    |
| PC8 ~ BMI                          | -0.002      | 0.20                                | $1.24 \times 10^{-5}$     |
| PC9 ~ BMI                          | -0.01       | 0.02 <sup>b</sup>                   | $9.43 \times 10^{-5}$     |
| PC10 ~ BMI                         | 0.002       | 0.44                                | $-8.05 \times 10^{-6}$    |

<sup>a</sup> Estimates derived from the testing/validation cohort.

<sup>b</sup> Significance set at  $p < 0.05$ .



**eTable 4. Phenotype and Mortality Outcome Definitions**

| <b>Phenotype</b> | <b>UKB Field ID/ICD-10 Code</b> |
|------------------|---------------------------------|
| BMI              | 21001-0.0                       |
| Sex              | 31-0.0                          |
| Age              | 21022-0.0                       |
| FMI              | 23100-0.0 and 50-0.0            |
| WHR              | 48-0.0 and 49-0.0               |
| Height           | 50-0.0                          |

| <b>Mortality Outcome</b>      | <b>UKB Field ID/ICD-10 Code</b>                    |
|-------------------------------|----------------------------------------------------|
| All-Cause Mortality           | 40000-0.0                                          |
| Cardiovascular Mortality      | ICD-10 Code: I                                     |
| Cancer Mortality              | ICD-10 Code: C                                     |
| Respiratory Disease Mortality | ICD-10 Codes: J00-09, J10-19, J20-22, J23-29, J3-9 |

**eTable 5. Association of BMI, FMI, and WHR With BMI, FMI, and WHR PRS<sup>a</sup>.**

All regression analyses were adjusted for PRS other than the one being analyzed (e.g. the BMI ~ BMI PRS analysis was adjusted for FMI PRS and WHR PRS), age, sex, and the first 10 principal components.

| <b>Phenotype ~ BMI PRS Association</b> | <b><math>\beta</math></b> | <b><i>P</i> value</b> |
|----------------------------------------|---------------------------|-----------------------|
| BMI ~ BMI PRS                          | 0.20                      | 0.004 <sup>b</sup>    |
| FMI ~ BMI PRS                          | 0.09                      | 0.005 <sup>b</sup>    |
| WHR ~ BMI PRS                          | -0.04                     |                       |

  

| <b>Phenotype ~ FMI PRS Association</b> | <b><math>\beta</math></b> | <b><i>P</i> value</b> |
|----------------------------------------|---------------------------|-----------------------|
| BMI ~ FMI PRS                          | 0.20                      | 0.005 <sup>b</sup>    |
| FMI ~ FMI PRS                          | 0.25                      |                       |
| WHR ~ FMI PRS                          | 0.08                      |                       |

  

| <b>Phenotype ~ WHR PRS Association</b> | <b><math>\beta</math></b> | <b><i>P</i> value</b> |
|----------------------------------------|---------------------------|-----------------------|
| BMI ~ WHR PRS                          | 0.02                      | 0.007 <sup>b</sup>    |
| FMI ~ WHR PRS                          | 0.03                      |                       |
| WHR ~ WHR PRS                          | 0.25                      |                       |

<sup>a</sup>Estimates derived from the testing/validation cohort.

<sup>b</sup> Significance set at  $p < 0.05$ .

**eFigure 1.** Association of BMI, FMI, and WHR With All-Cause Mortality in All UKB Participants (N = 387 672), Males (n = 177 340), and Females (n = 210 332)

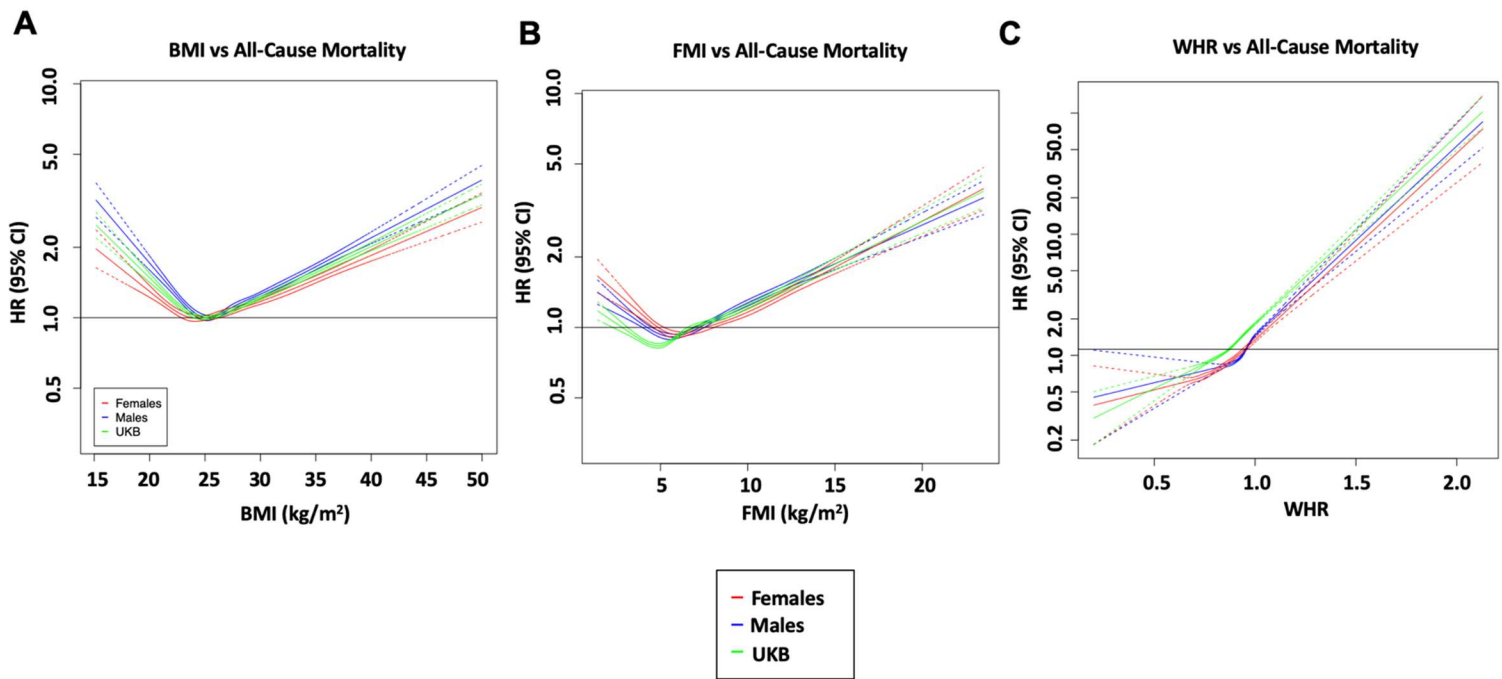

BMI = body mass index, FMI = fat mass index, WHR = Waist-to-hip ratio, HR = hazard ratio for all-cause mortality. Statistical significance for non-linearity Bonferroni-corrected to  $p < 0.05$ . The reference point at HR = 1 for BMI (25 kg/m<sup>2</sup>), the mean value for FMI in the UKB population (8.83 kg/m<sup>2</sup>), and the mean value for WHR in the UKB population (0.87) for analyses with BMI, FMI, and WHR were used as independent variables, respectively.

**eFigure 2.** Association of BMI, FMI, and WHR With Cause-Specific Mortality Outcomes

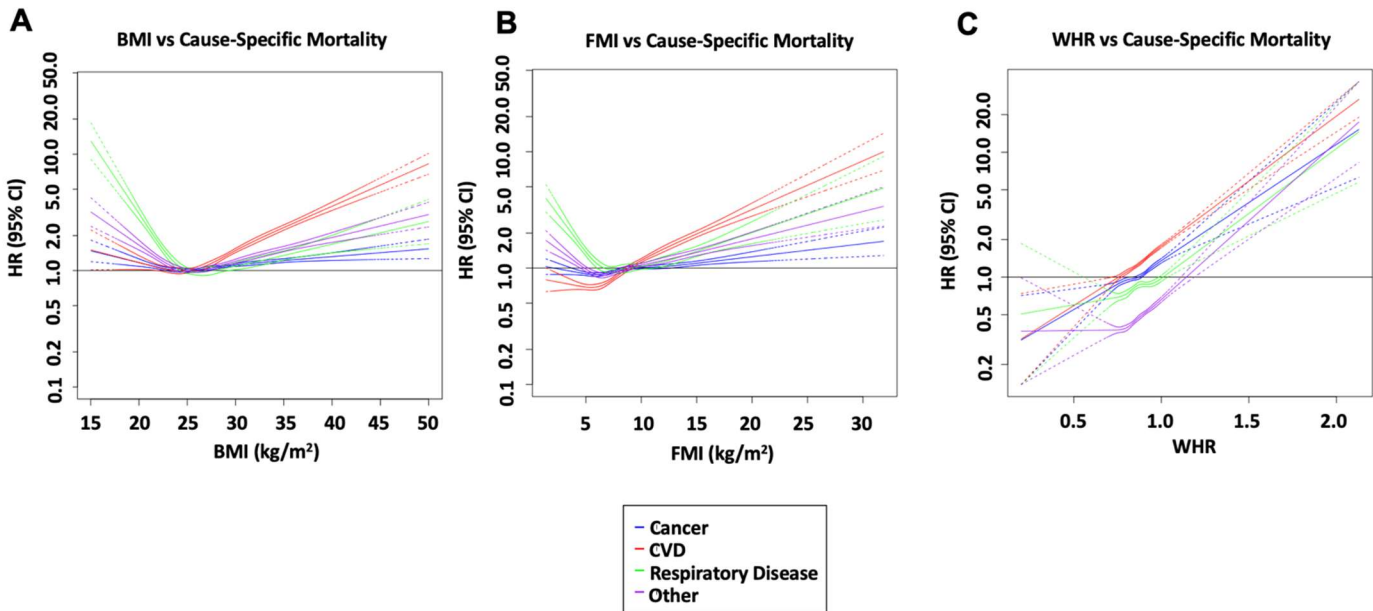

BMI = body mass index, FMI = fat mass index, WHR = Waist-to-hip ratio, CVD = cardiovascular disease, HR = hazard ratio for all-cause mortality. Statistical significance for non-linearity was at a  $p < 0.05$ .  $N = 387,672$ . Against respiratory disease, the nadir for BMI and FMI were 26.0 and 7.43 kg/m<sup>2</sup> respectively. Against other disease, the nadir for BMI and FMI were 25.5 and 6.55 kg/m<sup>2</sup> respectively. <sup>a</sup>Significance set at  $p < 0.05$

**eTable 6.** Linear Mendelian Randomization Analyses Comparing the Association of Individual Genetically Determined Adiposity Measures With All-Cause Mortality Between Premenopausal vs Postmenopausal Females in the UKB.

| Stratification by Menopausal Status | OR per SD change in BMI [95% CI] | <i>P</i> value          | OR per SD change in FMI [95% CI] | <i>P</i> value          | OR per SD change in WHR [95% CI] | <i>P</i> value | <i>P</i> value for heterogeneity for differences between groups |
|-------------------------------------|----------------------------------|-------------------------|----------------------------------|-------------------------|----------------------------------|----------------|-----------------------------------------------------------------|
| Females of Pre-Menopausal Age       | 1.17 [1.00 – 1.36]               | 0.04 <sup>a</sup>       | 1.14 [0.98 – 1.34]               | 0.10                    | 1.22 [0.95 – 1.56]               | 0.11           | 0.90                                                            |
| Females of Post-Menopausal Age      | 1.14 [1.08 – 1.22]               | 1.16 × 10 <sup>-5</sup> | 1.15 [1.08 – 1.22]               | 9.18 × 10 <sup>-6</sup> | 1.09 [1.00 – 1.19]               | 0.05           | 0.63                                                            |

Pre-menopausal age was defined as females aged 52 and younger, while post-menopausal age was defined as females aged 53 and older. All PRS were standardized for their effects on their corresponding traits (i.e. the BMI PRS was adjusted for its effect on BMI). Odds ratios (OR) indicate the effect of a 1 SD unit increase in adiposity measure on risk of all-cause mortality. Significance is considered at  $p < 0.05$ . BMI = body mass index, FMI = fat mass index, WHR = waist-to-hip ratio, OR = odds ratio, PRS = polygenic risk score,  $P_{\text{het}} = p$  value for heterogeneity from the fixed-effects general heterogeneity test.  $N_{\text{pre-menopausal}} = 2,300$ ;  $N_{\text{post-menopausal}} = 18,263$ . The adjusted model was used. Asterisks (\*) represent statistical significance.

**eFigure 3.** Comparison Between Epidemiologically Derived and MR Derived Estimates for the BMI–All-Cause Mortality Association

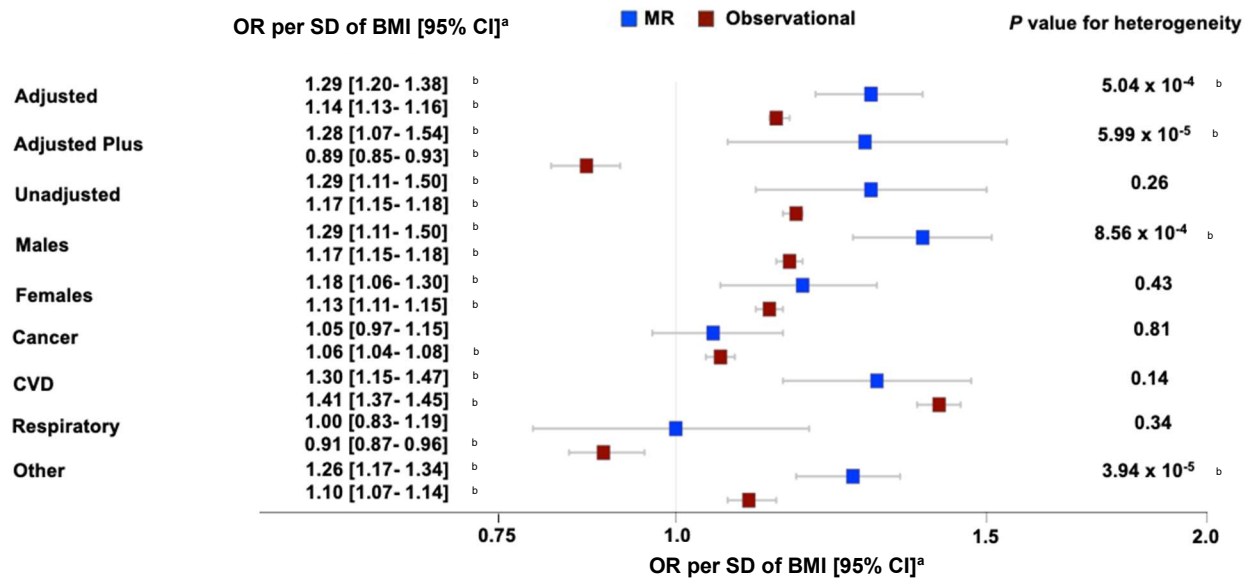

All PRS were standardized for their effects on their corresponding traits (e.g. the BMI PRS was adjusted for its effect on BMI). Hazard ratios (HR) indicate the effect of a 1 SD unit increase in BMI on risk of mortality. Odds ratios (OR) indicate the effect of a 1 SD unit increase in genetically-predicted BMI measure on risk of mortality. The adjusted model was used for all sex-specific and cause-specific mortality analyses. Significance is considered at  $p < 0.05$ . MR = mendelian randomization, BMI = body mass index, FMI = fat mass index, WHR = waist-to-hip ratio, CVD = cardiovascular disease, OR = odds ratio, HR = hazard ratio, PRS = polygenic risk score. N= 387,672 (adjusted, adjusted plus, unadjusted, and cause-specific mortality models with males and females combined, epidemiological analyses), N=50,594 (adjusted, adjusted plus, unadjusted, and cause-specific mortality models with males and females combined, MR analyses), N=177,340 (males only cohort, epidemiological analyses), N=210,332 (females only cohort, epidemiological analyses), N=30,031 (males only cohort, MR analyses), and N=20,563 (females only cohort, MR analyses). The  $p$  value for heterogeneity was obtained from the fixed-effects general heterogeneity test. Asterisks (\*) represent statistical significance. <sup>a</sup>OR for mendelian randomization analyses, HR for observational analyses. <sup>b</sup> Significance set at  $p < 0.05$ .

**eFigure 4.** Comparison Between Epidemiologically Derived and MR-Derived Estimates for the FMI–All-Cause Mortality Association

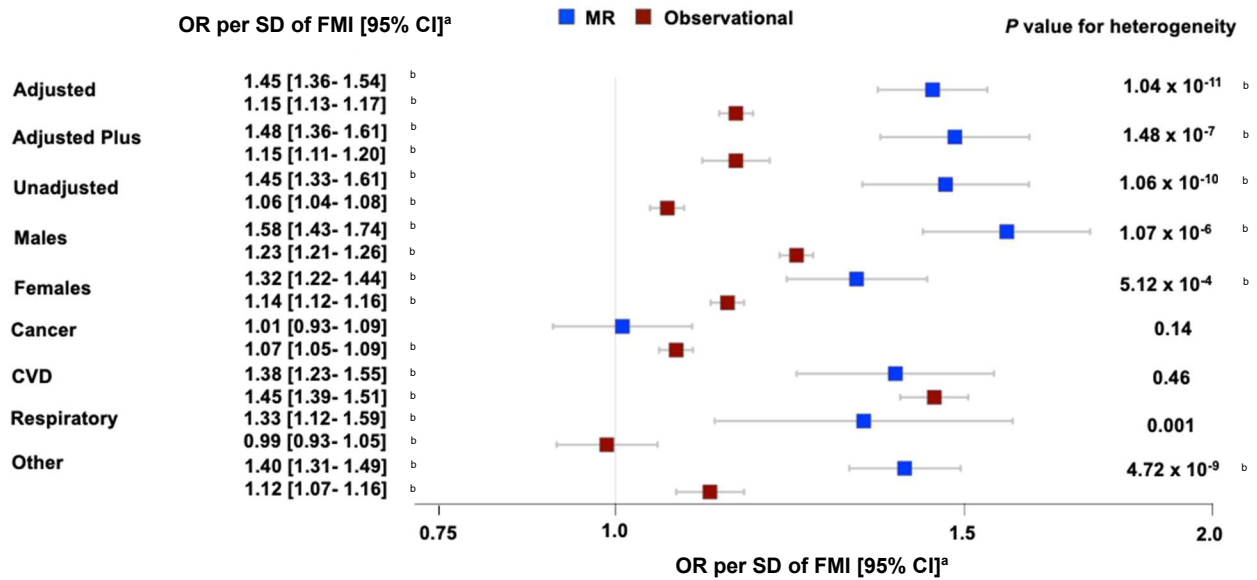

All PRS were standardized for their effects on their corresponding traits (e.g. the FMI PRS was adjusted for its effect on FMI). Hazard ratios (HR) indicate the effect of a 1 SD unit increase in FMI on risk of mortality. Odds ratios (OR) indicate the effect of a 1 SD unit increase in genetically-predicted FMI measure on risk of mortality. The adjusted model was used for all sex-specific and cause-specific mortality analyses. Significance is considered at  $p < 0.05$ . MR = mendelian randomization, BMI = body mass index, FMI = fat mass index, WHR = waist-to-hip ratio, CVD = cardiovascular disease, OR = odds ratio, HR = hazard ratio, PRS = polygenic risk score. N= 387,672 (adjusted, adjusted plus, unadjusted, and cause-specific mortality models with males and females combined, epidemiological analyses), N=50,594 (adjusted, adjusted plus, unadjusted, and cause-specific mortality models with males and females combined, MR analyses), N=177,340 (males only cohort, epidemiological analyses), N=210,332 (females only cohort, epidemiological analyses), N=30,031 (males only cohort, MR analyses), and N=20,563 (females only cohort, MR analyses). The  $p$  value for heterogeneity was obtained from the fixed-effects general heterogeneity test. Asterisks (\*) represent statistical significance. <sup>a</sup>OR for mendelian randomization analyses, HR for observational analyses. <sup>b</sup> Significance set at  $p < 0.05$ .

**eFigure 5.** Comparison Between Epidemiologically Derived and MR-Derived Estimates for the WHR–All-Cause Mortality Association

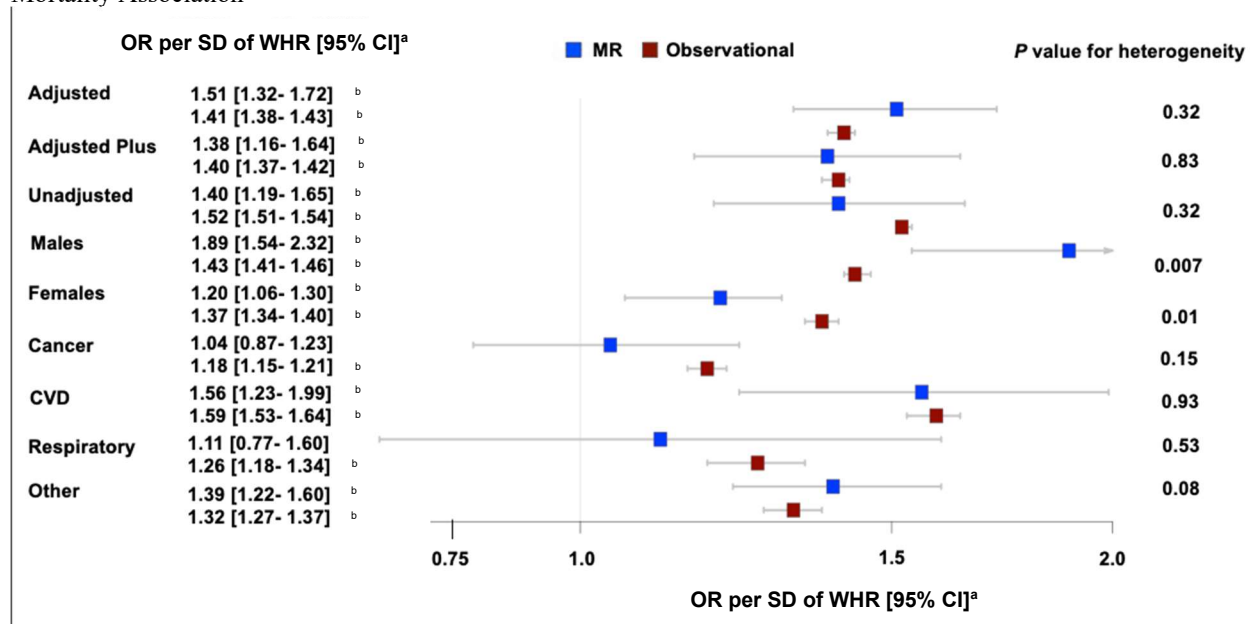

All PRS were standardized for their effects on their corresponding traits (e.g. the WHR PRS was adjusted for its effect on WHR). Hazard ratios (HR) indicate the effect of a 1 SD unit increase in WHR on risk of mortality. Odds ratios (OR) indicate the effect of a 1 SD unit increase in genetically-predicted WHR measure on risk of mortality. The adjusted model was used for all sex-specific and cause-specific mortality analyses. Significance is considered at  $p < 0.05$ . MR = mendelian randomization, BMI = body mass index, FMI = fat mass index, WHR = waist-to-hip ratio, CVD = cardiovascular disease, OR = odds ratio, HR = hazard ratio, PRS = polygenic risk score. N= 387,672 (adjusted, adjusted plus, unadjusted, and cause-specific mortality models with males and females combined, epidemiological analyses), N=50,594 (adjusted, adjusted plus, unadjusted, and cause-specific mortality models with males and females combined, MR analyses), N=177,340 (males only cohort, epidemiological analyses), N=210,332 (females only cohort, epidemiological analyses), N=30,031 (males only cohort, MR analyses), and N=20,563 (females only cohort, MR analyses). The  $p$  value for heterogeneity was obtained from the fixed-effects general heterogeneity test. Asterisks (\*) represent statistical significance. <sup>a</sup>OR for mendelian randomization analyses, HR for observational analyses. <sup>b</sup> Significance set at  $p < 0.05$ .



**eTable 7.** Select Single Nucleotide Variants (SNVs) Associated With BMI

All *p* values were statistically significant at  $p < 0.05$ .

| Chromosome | Base Position | SNPs        | Reference Allele | Alternate Allele | <i>P</i> -value | Beta  | OR   |
|------------|---------------|-------------|------------------|------------------|-----------------|-------|------|
| 1          | 136113        | rs546872994 | T                | C                | 0.008           | 0.199 | 1.22 |
| 2          | 22289729      | rs328560    | G                | A                | 0.005           | 0.09  | 1.10 |
| 3          | 104140278     | rs9859555   | C                | A                | 0.007           | -0.03 | 0.97 |
| 4          | 76551797      | rs113618143 | A                | G                | 0.002           | 0.04  | 1.04 |
| 5          | 78141479      | rs12189199  | G                | T                | 0.006           | -0.04 | 0.96 |
| 6          | 9130257       | rs185818601 | A                | C                | 0.004           | -0.49 | 0.61 |
| 7          | 75749694      | rs10264760  | G                | A                | 0.003           | -0.03 | 0.97 |
| 8          | 54252611      | rs141444940 | G                | A                | 0.009           | -0.06 | 0.94 |
| 9          | 120891023     | rs7866659   | G                | A                | 0.004           | -0.03 | 0.97 |
| 10         | 113787569     | rs2804591   | G                | A                | 0.009           | 0.04  | 1.04 |
| 11         | 12054894      | rs11022123  | A                | G                | 0.005           | 0.04  | 1.04 |
| 12         | 18156841      | rs10840933  | T                | C                | 0.009           | -0.04 | 0.97 |
| 13         | 25141521      | rs9551117   | G                | A                | 0.004           | 0.03  | 1.03 |
| 14         | 34721148      | rs17441461  | T                | C                | 0.0008          | 0.04  | 1.04 |
| 15         | 68989225      | rs72625782  | T                | C                | 0.003           | -0.04 | 0.96 |
| 16         | 544064        | rs143376029 | C                | T                | 0.001           | 0.04  | 1.04 |
| 17         | 7931282       | rs7217076   | G                | A                | 0.009           | 0.07  | 0.93 |
| 18         | 40808652      | rs10502808  | G                | A                | 0.0006          | 0.05  | 1.05 |
| 19         | 34207555      | rs157727    | A                | G                | 0.008           | 0.03  | 1.03 |
| 20         | 24604300      | rs4815290   | T                | C                | 0.0002          | 0.04  | 1.05 |
| 21         | 31771872      | rs553633919 | A                | G                | 0.003           | 0.40  | 0.67 |
| 22         | 51146439      | rs6010060   | G                | A                | 0.007           | -0.05 | 0.95 |

**eTable 8.** Select Single Nucleotide Variants (SNVs) Associated With FMI

| Chromosome | Base Position | SNPs        | Reference Allele | Alternate Allele | P-value | Beta   | OR   |
|------------|---------------|-------------|------------------|------------------|---------|--------|------|
| 1          | 1545546       | rs540146408 | G                | A                | 0.005   | -0.29  | 0.75 |
| 2          | 164586665     | rs7563112   | C                | T                | 0.002   | 0.03   | 1.03 |
| 3          | 131580315     | rs111740364 | T                | C                | 0.008   | 0.03   | 1.03 |
| 4          | 97594821      | rs7690245   | C                | T                | 0.0008  | 0.03   | 1.03 |
| 5          | 116911846     | rs265917    | T                | C                | 0.009   | 0.02   | 1.02 |
| 6          | 32615427      | rs17843575  | T                | C                | 0.0006  | -0.03  | 0.97 |
| 7          | 5501743       | rs4640961   | C                | T                | 0.009   | 0.03   | 1.03 |
| 8          | 71727296      | rs13263047  | A                | G                | 0.006   | -0.02  | 0.98 |
| 9          | 130302249     | rs76589843  | C                | T                | 0.005   | 0.09   | 1.09 |
| 10         | 1280920       | rs547655803 | G                | T                | 0.007   | -0.43  | 0.65 |
| 11         | 55923053      | rs7938955   | T                | C                | 0.005   | -0.02  | 0.98 |
| 12         | 6791077       | rs112936609 | G                | A                | 0.004   | -0.06  | 0.94 |
| 13         | 72496625      | rs191351864 | A                | C                | 0.002   | 0.11   | 1.11 |
| 14         | 91535660      | rs9989151   | T                | C                | 0.0009  | 0.03   | 1.03 |
| 15         | 72430434      | rs4777489   | G                | A                | 0.0003  | 0.03   | 1.03 |
| 16         | 24773132      | rs72768680  | A                | G                | 0.005   | 0.04   | 1.05 |
| 17         | 41508574      | rs34385883  | A                | G                | 0.01    | -0.02  | 0.98 |
| 18         | 60674395      | rs573747272 | C                | T                | 0.007   | 0.25   | 1.28 |
| 19         | 9202710       | rs79915041  | A                | G                | 0.008   | -0.073 | 0.93 |
| 20         | 54389179      | rs112226073 | T                | C                | 0.0004  | 0.03   | 1.03 |
| 21         | 44839654      | rs229346    | G                | A                | 0.007   | -0.03  | 0.97 |
| 22         | 40585744      | rs738450    | G                | A                | 0.0002  | 0.03   | 1.03 |

**eTable 9.** Select Single Nucleotide Variants (SNVs) Associated With WHR

| Chromosome | Base Position | SNPs        | Reference Allele | Alternate Allele | P-value | Beta    | OR   |
|------------|---------------|-------------|------------------|------------------|---------|---------|------|
| 1          | 1310291       | rs536418752 | A                | C                | 0.004   | 0.002   | 1.00 |
| 2          | 524699        | rs531034327 | A                | C                | 0.002   | -0.008  | 0.99 |
| 3          | 140937223     | rs58903469  | C                | T                | 0.004   | 0.0007  | 1.00 |
| 4          | 55698811      | rs2726623   | T                | C                | 0.0003  | -0.0006 | 0.99 |
| 5          | 54670639      | rs6886473   | T                | C                | 0.0002  | -0.001  | 1.00 |
| 6          | 20823756      | rs6923264   | C                | T                | 0.0001  | 0.0006  | 1.00 |
| 7          | 32272429      | rs12701194  | A                | G                | 0.001   | -0.0005 | 0.99 |
| 8          | 41877174      | rs12546563  | A                | C                | 0.0007  | -0.001  | 1.00 |
| 9          | 81366872      | rs2210417   | T                | C                | 0.0002  | 0.0006  | 1.00 |
| 10         | 20962310      | rs141964776 | T                | C                | 0.008   | 0.002   | 1.00 |
| 11         | 121922587     | rs11218510  | A                | G                | 0.0003  | 0.0006  | 1.00 |
| 12         | 62055240      | rs144906178 | A                | G                | 0.0009  | -0.003  | 1.00 |
| 13         | 60779102      | rs11617610  | T                | C                | 0.0002  | 0.0006  | 1.00 |
| 14         | 25942665      | rs10143820  | T                | C                | 0.0004  | 0.0006  | 1.00 |
| 15         | 41055195      | rs3759796   | C                | T                | 0.005   | 0.0005  | 1.00 |
| 16         | 52298333      | rs12932031  | G                | A                | 0.0008  | -0.0007 | 0.99 |
| 17         | 41141971      | rs323496    | C                | T                | 0.005   | 0.0005  | 1.00 |
| 18         | 48590029      | rs2510000   | T                | C                | 0.002   | -0.001  | 0.99 |
| 19         | 10074240      | rs554922285 | T                | G                | 0.0005  | 0.002   | 1.00 |
| 20         | 48592000      | rs6091075   | G                | A                | 0.002   | -0.0006 | 0.99 |
| 21         | 39775084      | rs2073359   | T                | C                | 0.001   | 0.0005  | 1.00 |
| 22         | 51176164      | rs76593947  | C                | T                | 0.006   | -0.002  | 0.99 |

**Table 10.** Egger Regression Mendelian Randomization Analyses

<sup>a</sup> Statistical significance at  $p < 0.05$ .

*BMI*

Linkage disequilibrium thresholds for pruning using PLINK:

Clumping window: 500 kb

Clumping R2 threshold: 0.1

Clumping  $p$  value for significance for index SNPs: 1

Number of SNPs included in the analysis: 389

| <b>Outcome</b>                   | <b>Estimate</b> | <b>Estimate (OR)</b> | <b>P value</b> | <b>P value for intercept</b> |
|----------------------------------|-----------------|----------------------|----------------|------------------------------|
| All-cause mortality              | 0.32            | 1.32                 | 0.08           | 0.86                         |
| Cancer mortality                 | -0.15           | 0.86                 | 0.59           | 0.14                         |
| Cardiovascular disease mortality | 0.82            | 1.82                 | 0.04           | 0.43                         |
| Respiratory disease mortality    | 0.81            | 1.81                 | 0.62           | 0.20                         |
| Other disease mortality          | 0.61            | 1.61                 | 0.11           | 0.39                         |

*FMI*

Linkage disequilibrium thresholds for pruning using PLINK:

Clumping window: 500 kb

Clumping R2 threshold: 0.1

Clumping  $p$  value for significance for index SNPs: 1

Number of SNPs included in the analysis: 393

| <b>Outcome</b>                   | <b>Estimate</b> | <b>Estimate (OR)</b> | <b>P value</b>    | <b>P value for intercept</b> |
|----------------------------------|-----------------|----------------------|-------------------|------------------------------|
| All-cause mortality              | 0.06            | 1.06                 | 0.01 <sup>a</sup> | 0.13                         |
| Cancer mortality                 | -0.007          | 0.99                 | 0.85              | 0.03                         |
| Cardiovascular disease mortality | 0.09            | 1.09                 | 0.10              | 0.31                         |
| Respiratory disease mortality    | 0.12            | 1.12                 | 0.12              | 0.13                         |
| Other disease mortality          | 0.08            | 1.08                 | 0.10              | 0.90                         |

*WHR*

Linkage disequilibrium thresholds for pruning using PLINK:

Clumping window: 500 kb

Clumping R2 threshold: 0.1

Clumping  $p$  value for significance for index SNPs: 1

Number of SNPs included in the analysis: 217

| <b>Outcome</b>                   | <b>Estimate</b> | <b>Estimate (OR)</b> | <b>P value</b> | <b>P value for intercept</b> |
|----------------------------------|-----------------|----------------------|----------------|------------------------------|
| All-cause mortality              | -0.03           | 0.97                 | 0.93           | 0.34                         |
| Cancer mortality                 | 0.17            | 1.17                 | 0.71           | 0.85                         |
| Cardiovascular disease mortality | 0.86            | 1.86                 | 0.26           | 0.48                         |
| Respiratory disease mortality    | 0.08            | 1.08                 | 0.94           | 0.79                         |
| Other disease mortality          | -0.26           | 0.77                 | 0.71           | 0.40                         |

**eTable 11.** Inverse Variance Weighted Mendelian Randomization Analyses

*BMI*

Linkage disequilibrium thresholds for pruning using PLINK:

Clumping window: 500 kb

Clumping R2 threshold: 0.1

Clumping *p* value for significance for index SNPs: 1

Number of SNPs included in the analysis: 389

| <b>Outcome</b>                   | <b>Estimate</b> | <b>Estimate (OR)</b> | <b>P value</b>                      |
|----------------------------------|-----------------|----------------------|-------------------------------------|
| All-cause mortality              | 0.36            | 1.36                 | $9.35 \times 10^{-13}$ <sup>a</sup> |
| Cancer mortality                 | 0.26            | 1.26                 | 0.0009 <sup>a</sup>                 |
| Cardiovascular disease mortality | 0.52            | 1.52                 | $2.37 \times 10^{-6}$ <sup>a</sup>  |
| Respiratory disease mortality    | 0.06            | 1.06                 | 0.72                                |
| Other disease mortality          | 0.30            | 1.30                 | 0.004 <sup>a</sup>                  |

*FMI*

Linkage disequilibrium thresholds for pruning using PLINK:

Clumping window: 500 kb

Clumping R2 threshold: 0.1

Clumping *p* value for significance for index SNPs: 1

Number of SNPs included in the analysis: 393

| <b>Outcome</b>                   | <b>Estimate</b> | <b>Estimate (OR)</b> | <b>P value</b>                      |
|----------------------------------|-----------------|----------------------|-------------------------------------|
| All-cause mortality              | 0.09            | 1.09                 | $2.48 \times 10^{-12}$ <sup>a</sup> |
| Cancer mortality                 | 0.06            | 1.06                 | 0.003 <sup>a</sup>                  |
| Cardiovascular disease mortality | 0.13            | 1.13                 | $5.76 \times 10^{-6}$ <sup>a</sup>  |
| Respiratory disease mortality    | 0.02            | 1.02                 | 0.61                                |
| Other disease mortality          | 0.08            | 1.08                 | 0.005 <sup>a</sup>                  |

*WHR*

Linkage disequilibrium thresholds for pruning using PLINK:

Clumping window: 500 kb

Clumping R2 threshold: 0.1

Clumping *p* value for significance for index SNPs: 1

Number of SNPs included in the analysis: 217

| <b>Outcome</b>                   | <b>Estimate</b> | <b>Estimate (OR)</b> | <b>P value</b>                     |
|----------------------------------|-----------------|----------------------|------------------------------------|
| All-cause mortality              | 0.29            | 1.29                 | $6.72 \times 10^{-5}$ <sup>a</sup> |
| Cancer mortality                 | 0.26            | 1.26                 | 0.008 <sup>a</sup>                 |
| Cardiovascular disease mortality | 0.33            | 1.33                 | 0.04 <sup>a</sup>                  |

|                               |      |      |                   |
|-------------------------------|------|------|-------------------|
| Respiratory disease mortality | 0.36 | 1.36 | 0.11              |
| Other disease mortality       | 0.32 | 1.34 | 0.03 <sup>a</sup> |

**eTable 12.** Weighted Median Mendelian Randomization Analyses

*BMI*

Linkage disequilibrium thresholds for pruning using PLINK:

Clumping window: 500 kb

Clumping R2 threshold: 0.1

Clumping *p* value for significance for index SNPs: 1

Number of SNPs included in the analysis: 389

| <b>Outcome</b>                   | <b>Estimate</b> | <b>Estimate (OR)</b> | <b>P value</b>                       |
|----------------------------------|-----------------|----------------------|--------------------------------------|
| All-cause mortality              | 0.31            | 1.31                 | 3.68 x 10 <sup>-5</sup> <sup>a</sup> |
| Cancer mortality                 | 0.17            | 1.17                 | 0.13                                 |
| Cardiovascular disease mortality | 0.48            | 1.48                 | 0.004 <sup>a</sup>                   |
| Respiratory disease mortality    | 0.06            | 1.06                 | 0.82                                 |
| Other disease mortality          | 0.15            | 1.15                 | 0.38                                 |

*FMI*

Linkage disequilibrium thresholds for pruning using PLINK:

Clumping window: 500 kb

Clumping R2 threshold: 0.1

Clumping *p* value for significance for index SNPs: 1

Number of SNPs included in the analysis: 393

| <b>Outcome</b>                   | <b>Estimate</b> | <b>Estimate (OR)</b> | <b>P value</b>     |
|----------------------------------|-----------------|----------------------|--------------------|
| All-cause mortality              | 1.07            | 1.07                 | 0.002 <sup>a</sup> |
| Cancer mortality                 | -0.01           | 0.99                 | 0.72               |
| Cardiovascular disease mortality | 0.13            | 1.13                 | 0.02 <sup>a</sup>  |
| Respiratory disease mortality    | 0.11            | 1.11                 | 0.15               |
| Other disease mortality          | 0.04            | 1.04                 | 0.41               |

*WHR*

Linkage disequilibrium thresholds for pruning using PLINK:

Clumping window: 500 kb

Clumping R2 threshold: 0.1

Clumping *p* value for significance for index SNPs: 1

Number of SNPs included in the analysis: 217

| <b>Outcome</b>                   | <b>Estimate</b> | <b>Estimate (OR)</b> | <b>P value</b>     |
|----------------------------------|-----------------|----------------------|--------------------|
| All-cause mortality              | 0.30            | 1.30                 | 0.002 <sup>a</sup> |
| Cancer mortality                 | 0.17            | 1.17                 | 0.20               |
| Cardiovascular disease mortality | 0.26            | 1.26                 | 0.24               |



|                               |      |      |      |
|-------------------------------|------|------|------|
| Respiratory disease mortality | 0.41 | 1.41 | 0.22 |
| Other disease mortality       | 0.34 | 1.34 | 0.10 |

**eTable 13.** Summary of Epidemiological and Linear Mendelian Randomization Analyses of Adiposity Measures and All-Cause Mortality: Full Adjusted Model

Hazard ratios (HR) indicate the effect of a 1 SD unit increase in adiposity measure on risk of all-cause mortality. Odds ratios (OR) indicate the effect of a 1 SD unit increase in genetically-determined adiposity measure on risk of all-cause mortality. The adjusted model was used for all sex-specific analyses. MR = mendelian randomization, BMI = body mass index, FMI = fat mass index, WHR = waist-to-hip ratio, OR = odds ratio, HR = hazard ratio, PRS = polygenic risk score. N=50,594 (adjusted model with males and females combined), N=30,031 (males only cohort), and N=20,563 (females only cohort). All relationships have  $p < 0.05$ .

| All-Cause Mortality  |                 | OR/HR per SD change in BMI [95% CI] | OR/HR per SD change in FMI [95% CI] | OR/HR per SD change in WHR [95% CI] |
|----------------------|-----------------|-------------------------------------|-------------------------------------|-------------------------------------|
| Fully adjusted model | MR              | 1.14 [1.04 - 1.25]                  | 1.24 [1.13 - 1.36]                  | 1.13 [0.92 - 1.40]                  |
|                      | Epidemiological | 0.87 [0.82 - 0.90]                  | 1.15 [1.09 - 1.22]                  | 1.30 [1.27 - 1.33]                  |

**eFigure 6.** Nonlinear Mendelian Randomization Analyses Comparing Genetically Determined Adiposity Measure–All-Cause Mortality Associations Across BMI Quantiles

All PRS were standardized for their effects on their corresponding traits (i.e. the BMI PRS was adjusted for its effect on BMI). Significance is considered at  $p < 0.05$ . Asterisks (\*) represent statistical significance. Statistical significance indicates inconsistency of the adiposity-mortality relationship across quantiles of the relevant adiposity measure. The horizontal line indicates an OR of 1. BMI = body mass index, FMI = fat mass index, WHR = waist-to-hip ratio, PRS = polygenic risk score, OR= odds ratio for all-cause mortality per SD of the adiposity measure,  $P_{\text{non-linearity}} = p$  value from ANOVA testing for non-linearity.  $n = 50,007$ .

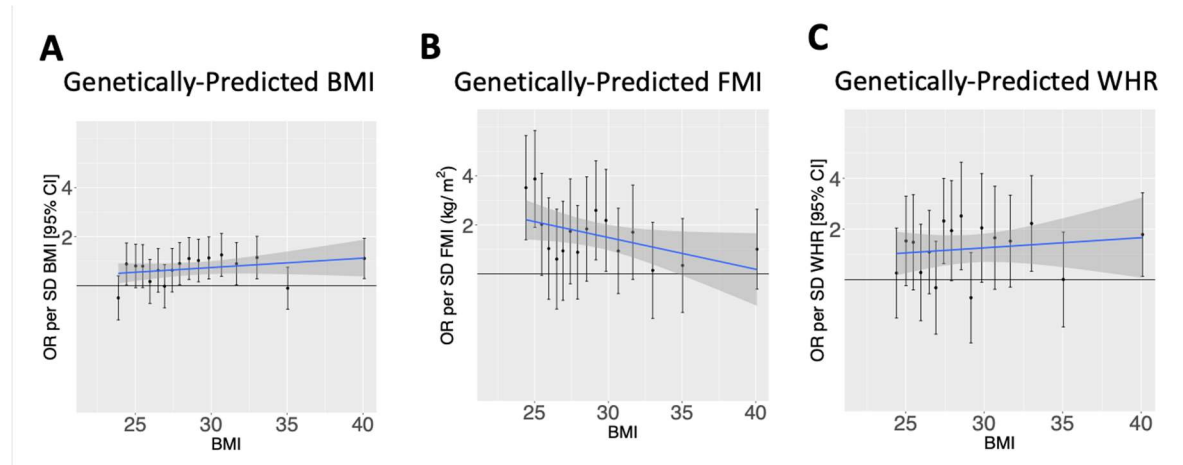

**eFigure 7.** Epidemiological Association Between BMI, FMI, and WHR and All-Cause Mortality Across Age Groups

The relationship between a) BMI, b) FMI, and c) WHR respectively across different age groups. BMI = body mass index, FMI = fat mass index, WHR = Waist-to-hip ratio, HR = hazard ratio for all-cause mortality. Statistical significance for non-linearity was defined as  $p < 0.05$ .  $N_{\text{under } 49} = 74,003$ ,  $N_{49-56} = 80,934$ ,  $N_{56-61} = 77,109$ ,  $N_{61-64} = 60,329$  and  $N_{\text{over } 64} = 95,269$ . Across age groups <49, 49-56, 56-61, 61-64, and >64, the nadir for BMI were 26.1, 24.8, 25.5, 25.1 and 25.0  $\text{kg}/\text{m}^2$  respectively. Across age groups <49, 49-56, 56-61, 61-64, and >64, the nadir for FMI were 5.42, 6.11, 6.55, 6.31, and 6.30  $\text{kg}/\text{m}^2$  respectively.

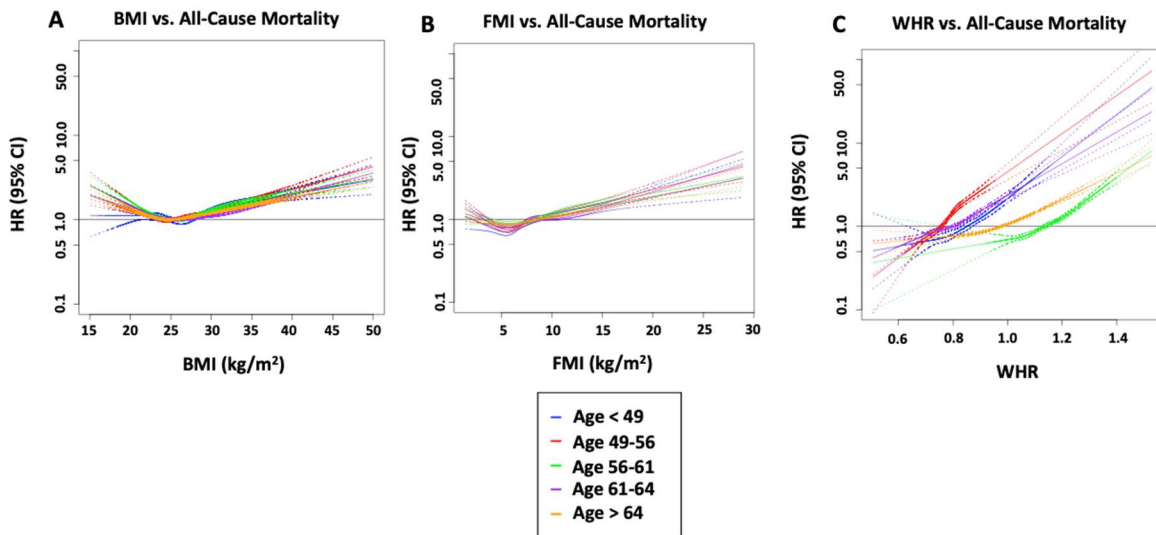

**eTable 14.** Summary of Epidemiological and Linear Mendelian Randomization Analyses of Adiposity Measures and All-Cause Mortality Across Age Groups

All PRS were standardized for their effects on their corresponding traits (i.e. the BMI PRS was adjusted for its effect on BMI). Odds ratios (OR) indicate the effect of a 1 SD unit increase in adiposity measure on risk of all-cause mortality. Significance is considered at  $p < 0.05$ . BMI = body mass index, FMI = fat mass index, WHR = waist-to-hip ratio, OR = odds ratio, PRS = polygenic risk score, Observational analyses:  $N_{\text{under } 49} = 74,003$ ,  $N_{49-56} = 80,934$ ,  $N_{56-61} = 77,109$ ,  $N_{61-64} = 60,329$ , and  $N_{\text{over } 64} = 95,269$ . MR analyses:  $N_{\text{under } 49} = 2,604$ ,  $N_{49-56} = 5,428$ ,  $N_{56-61} = 9,080$ ,  $N_{61-64} = 10,056$  and  $N_{\text{over } 64} = 23,426$ . The adjusted model was used. <sup>a</sup>OR for mendelian randomization analyses, HR for observational analyses. <sup>b</sup>Statistical significance at  $p < 0.05$ .

| All-Cause Mortality |                 | OR per SD change in BMI [95% CI] <sup>a</sup> | P value             | OR per SD change in FMI [95% CI] <sup>a</sup> | P value             | OR per SD change in WHR [95% CI] <sup>a</sup> | P value             |                     |
|---------------------|-----------------|-----------------------------------------------|---------------------|-----------------------------------------------|---------------------|-----------------------------------------------|---------------------|---------------------|
| Age < 49            | MR              | 1.01 [0.77 – 1.32]                            | 0.96                | 1.22 [0.94 – 1.59]                            | 0.14                | 1.06 [0.62 – 1.81]                            | 0.82                |                     |
|                     | Epidemiological | 1.17 [1.12 – 1.23]                            | <0.001 <sup>b</sup> | 1.22 [1.16 – 1.29]                            | <0.001 <sup>b</sup> | 1.57 [1.46 – 1.68]                            | <0.001 <sup>b</sup> |                     |
| Age 49-56           | MR              | 1.40 [1.17 – 1.67]                            |                     | 1.89 [1.58 – 2.26]                            |                     | 2.44 [1.68 – 3.53]                            |                     |                     |
|                     | Epidemiological | 1.19 [1.15 – 1.23]                            |                     | 1.23 [1.19 – 1.28]                            |                     | 1.43 [1.39 – 1.48]                            |                     |                     |
| Age 56-61           | MR              | 1.34 [1.16 – 1.55]                            |                     | 1.62 [1.40 – 1.88]                            |                     | 1.29 [0.93 – 1.81]                            |                     | 0.13                |
|                     | Epidemiological | 1.15 [1.12 – 1.19]                            |                     | 1.19 [1.15 – 1.23]                            |                     | 1.49 [1.44 – 1.55]                            |                     | <0.001 <sup>b</sup> |
| Age 61-64           | MR              | 1.27 [1.10 – 1.47]                            |                     | 0.0014 <sup>b</sup>                           |                     | 1.37 [1.18 – 1.57]                            |                     | <0.001 <sup>b</sup> |
|                     | Epidemiological | 1.14 [1.11 – 1.17]                            | <0.001 <sup>b</sup> | 1.17 [1.13 – 1.20]                            | <0.001 <sup>b</sup> | 1.42 [1.37 – 1.47]                            | <0.001 <sup>b</sup> |                     |
| Age > 64            | MR              | 1.28 [1.15 – 1.42]                            | <0.001 <sup>b</sup> | 1.36 [1.23 – 1.50]                            | <0.001 <sup>b</sup> | 1.53 [1.24 – 1.89]                            | <0.001 <sup>b</sup> |                     |
|                     | Epidemiological | 1.14 [1.12 – 1.16]                            | <0.001 <sup>b</sup> | 1.16 [1.14 – 1.19]                            | <0.001 <sup>b</sup> | 1.37 [1.34 – 1.40]                            | <0.001 <sup>b</sup> |                     |

**eFigure 8.** Comparison Between Epidemiologically Derived and MR-Derived Estimates for the BMI–All-Cause Mortality Association Between Age Groups

All PRS were standardized for their effects on their corresponding traits (e.g. the BMI PRS was adjusted for its effect on BMI). Hazard ratios (HR) indicate the effect of a 1 SD unit increase in BMI on risk of mortality. Odds ratios (OR) indicate the effect of a 1 SD unit increase in genetically-predicted BMI measure on risk of mortality. The adjusted model was used for all age-stratified analyses. Significance is considered at  $p < 0.05$ . MR = mendelian randomization, BMI = body mass index, OR = odds ratio, HR = hazard ratio, PRS = polygenic risk score. Observational analyses:  $N_{\text{under } 49} = 74,003$ ,  $N_{49-56} = 80,934$ ,  $N_{56-61} = 77,109$ ,  $N_{61-64} = 60,329$ , and  $N_{\text{over } 64} = 95,269$ . MR analyses:  $N_{\text{under } 49} = 2,604$ ,  $N_{49-56} = 5,428$ ,  $N_{56-61} = 9,080$ ,  $N_{61-64} = 10,056$  and  $N_{\text{over } 64} = 23,426$ . The  $p$  value for heterogeneity was obtained from the fixed-effects general heterogeneity test. Asterisks (\*) represent statistical significance. <sup>a</sup>OR for mendelian randomization analyses, HR for observational analyses. <sup>b</sup>Statistical significance at  $p < 0.05$ .

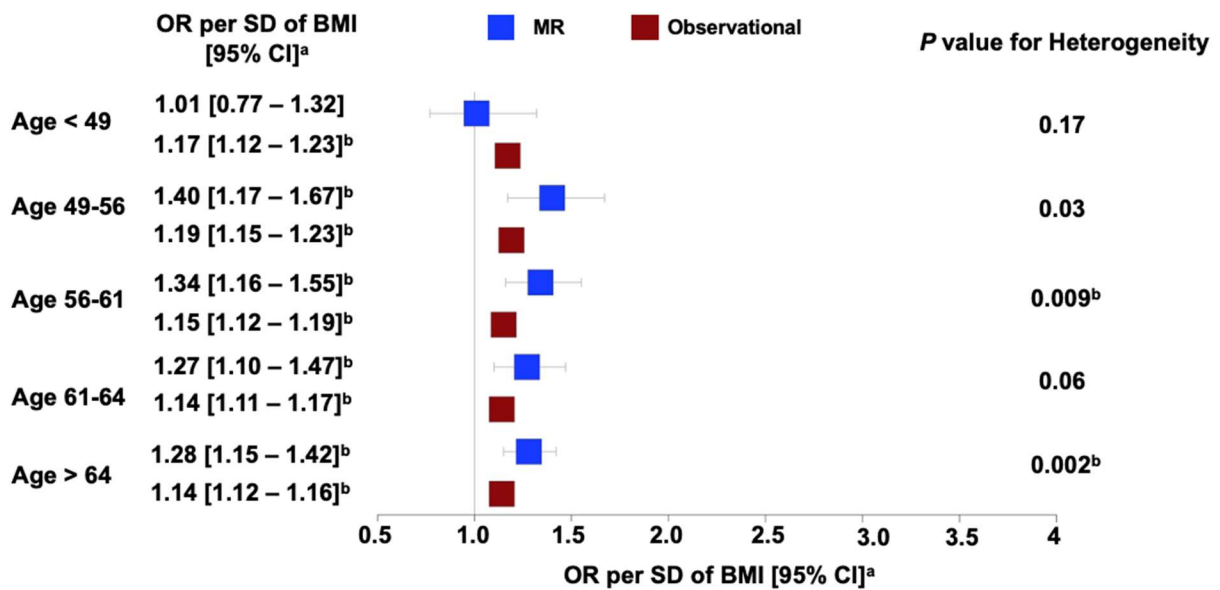

**eFigure 9.** Comparison Between Epidemiologically Derived and MR-Derived Estimates for the FMI–All-Cause Mortality Association Between Age Groups

All PRS were standardized for their effects on their corresponding traits (e.g. the FMI PRS was adjusted for its effect on FMI). Hazard ratios (HR) indicate the effect of a 1 SD unit increase in FMI on risk of mortality. Odds ratios (OR) indicate the effect of a 1 SD unit increase in genetically-predicted FMI measure on risk of mortality. The adjusted model was used for all age-stratified analyses. Significance is considered at  $p < 0.05$ . MR = mendelian randomization, FMI = fat mass index, OR = odds ratio, HR = hazard ratio, PRS = polygenic risk score. Observational analyses:  $N_{\text{under } 49} = 74,003$ ,  $N_{49-56} = 80,934$ ,  $N_{56-61} = 77,109$ ,  $N_{61-64} = 60,329$ , and  $N_{\text{over } 64} = 95,269$ . MR analyses:  $N_{\text{under } 49} = 2,604$ ,  $N_{49-56} = 5,428$ ,  $N_{56-61} = 9,080$ ,  $N_{61-64} = 10,056$  and  $N_{\text{over } 64} = 23,426$ . The  $p$  value for heterogeneity was obtained from the fixed-effects general heterogeneity test. Asterisks (\*) represent statistical significance. <sup>a</sup>OR for mendelian randomization analyses, HR for observational analyses. <sup>b</sup>Statistical significance at  $p < 0.05$ .

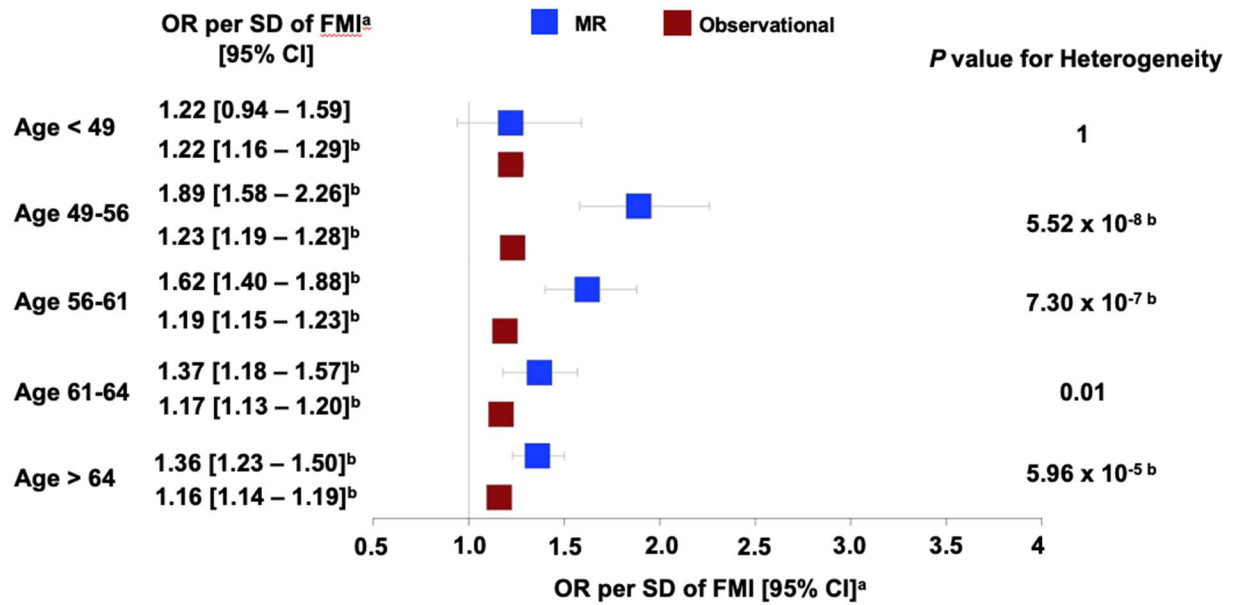

**eFigure 10.** Comparison Between Epidemiologically Derived and MR-Derived Estimates for the WHR–All-Cause Mortality Association Between Age Groups

Comparison between epidemiologically-derived and MR-derived estimates for the WHR – all-cause mortality relationship between age groups. All PRS were standardized for their effects on their corresponding traits (e.g. the WHR PRS was adjusted for its effect on WHR). Hazard ratios (HR) indicate the effect of a 1 SD unit increase in WHR on risk of mortality. Odds ratios (OR) indicate the effect of a 1 SD unit increase in genetically-predicted WHR measure on risk of mortality. The adjusted model was used for all age-stratified analyses. Significance is considered at  $p < 0.05$ . MR = mendelian randomization, WHR = waist-to-hip ratio, OR = odds ratio, HR = hazard ratio, PRS = polygenic risk score. Observational analyses:  $N_{\text{under } 49} = 74,003$ ,  $N_{49-56} = 80,934$ ,  $N_{56-61} = 77,109$ ,  $N_{61-64} = 60,329$ , and  $N_{\text{over } 64} = 95,269$ . MR analyses:  $N_{\text{under } 49} = 2,604$ ,  $N_{49-56} = 5,428$ ,  $N_{56-61} = 9,080$ ,  $N_{61-64} = 10,056$  and  $N_{\text{over } 64} = 23,426$ . The  $p$  value for heterogeneity was obtained from the fixed-effects general heterogeneity test. Asterisks (\*) represent statistical significance. <sup>a</sup>OR for mendelian randomization analyses, HR for observational analyses. <sup>b</sup>Statistical significance at  $p < 0.05$ .

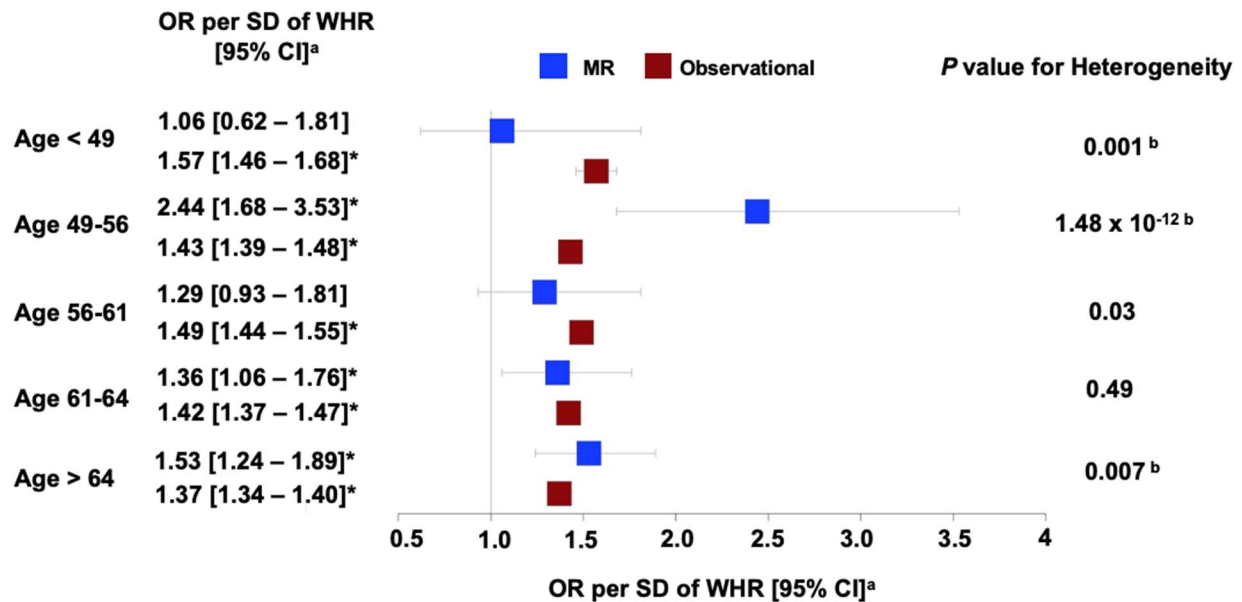



**eTable 15.** Comparison Between the Cox Regression and Logistic Regression Model in the Adjusted Linear Mendelian Randomization Analysis

The adjusted model was used for all analyses. MR = mendelian randomization, BMI = body mass index, FMI = fat mass index, WHR = waist-to-hip ratio, OR = odds ratio, HR = hazard ratio, PRS = polygenic risk score. N=50,594, All relationships have  $p < 0.05$ .

| All-Cause Mortality                                                    | BMI                | FMI                | WHR                |
|------------------------------------------------------------------------|--------------------|--------------------|--------------------|
| <b>Logistic Regression (OR per SD change (95% CI))</b>                 | 1.29 (1.20 – 1.38) | 1.45 (1.36 – 1.54) | 1.51 (1.32 – 1.72) |
| <b>Cox Proportional Hazards Regression (HR per SD change (95% CI))</b> | 1.14 (1.10 – 1.20) | 1.21 (1.15 - 1.26) | 1.30 (1.18 – 1.42) |

**eTable 16.** Comparison Between the Cox Regression and Logistic Regression Model in the Adjusted Observational Analysis

The adjusted model was used for all analyses. MR = mendelian randomization, BMI = body mass index, FMI = fat mass index, WHR = waist-to-hip ratio, OR = odds ratio, HR = hazard ratio, PRS = polygenic risk score. N=387,672. All relationships have  $p < 0.05$ .

| All-Cause Mortality                                                    | BMI                | FMI                | WHR                |
|------------------------------------------------------------------------|--------------------|--------------------|--------------------|
| <b>Logistic Regression (OR per SD change (95% CI))</b>                 | 1.15 (1.14 – 1.17) | 1.19 (1.17 – 1.21) | 1.38 (1.36 – 1.40) |
| <b>Cox Proportional Hazards Regression (HR per SD change (95% CI))</b> | 1.06 (1.05 – 1.08) | 1.14 (1.13 - 1.16) | 1.22 (1.20 – 1.24) |

## eReferences

1. Locke AE, Kahali B, Berndt SI, *et al.* Genetic studies of body mass index yield new insights for obesity biology. *Nature* 2015; **518**: 197-206. DOI: 10.1038/nature14177.
2. The CARDIoGRAMplusC4D Consortium. Large-scale association analysis identifies new risk loci for coronary artery disease. *Nat Genet* 2013;**45**: 25–33. DOI: 10.1038/ng.2480.
3. Lagou V, Mägi R, Hottenga JJ. *et al.* Sex-dimorphic genetic effects and novel loci for fasting glucose and insulin variability. *Nat Commun* 2021;**12**, 1-18. DOI: 10.1038/s41467-020-19366-9
4. Pigeyre M, Sjaarda J, Mao S, *et al.* Identification of novel causal blood biomarkers linking metabolically favorable adiposity with type 2 diabetes risk. *Diabetes Care* 2019; **42**: 1800-1808. DOI: 10.2337/dc18-2444.
5. Klarin D, Damrauer SM, Cho K, *et al.* Genetics of blood lipids among ~300,000 multi-ethnic participants of the Million Veteran Program. *Nat Genet*, 2018; **50**, 1514-1523. DOI: 10.1038/s41588-018-0222-9.
6. Medina-Gomez C, Kemp JP, Dimou NL, *et al.* Bivariate genome-wide association meta-analysis of pediatric musculoskeletal traits reveals pleiotropic effects at the SREBF1/TOM1L2 locus. *Nat Commun* 2017;**8**:121. DOI: 10.1038/s41467-017-00108-3.
7. Jung K, Lee J, Gupta V, *et al.* Comparison of Bootstrap Confidence Interval Methods for GSCA Using a Monte Carlo Simulation. *Front Psychol*, 2019; **10**: 2215. doi: 10.3389/fpsyg.2019.02215.
8. Bradbury KE, Guo W, Cairns BJ, *et al.* Association between physical activity and body fat percentage, with adjustment for BMI: a large cross-sectional analysis of UK Biobank. *BMJ Open* 2017;**7**:e011843. DOI: 10.1136/bmjopen-2016-011843.
9. Mbatchou J, Barnard L, Backman J, *et al.* Computationally efficient whole-genome regression for quantitative and binary traits. *Nat Genet.* 2021;**53**:1097-1103. DOI:10.1038/s41588-021-00870-7
10. Sun YQ, Burgess S, Staley JR, *et al.* Body mass index and all cause mortality in HUNT and UK Biobank studies: linear and non-linear mendelian randomisation analyses. *BMJ* 2019, **364**, 1-10. DOI: 10.1136/bmj.11042.
11. Bhaskaran K, Dos-Santos-Silva I, Leon DA, *et al.* Association of BMI with overall and cause-specific mortality: a population-based cohort study of 3.6 million adults in the UK. *Lancet Diabetes Endocrinol* 2018; **6**: 944-953. DOI: 10.1016/S2213-8587(18)30288-2.
12. Staley JR & Burgess S. Semiparametric methods for estimation of a nonlinear exposure-outcome relationship using instrumental variables with application to Mendelian randomization. *Genet Epidemiol.* 2017, **41**, 341-352. DOI: 10.1002/gepi.22041.
13. Yengo L, Sidorenko J, Kemper KE, *et al.* Meta-analysis of genome-wide association studies for height and body mass index in ~700,000 individuals of European ancestry. *Biorxiv* 2018. Retrieved from: [https://portals.broadinstitute.org/collaboration/giant/index.php/GIANT\\_consortium\\_data\\_files#BMI\\_and\\_Height\\_GIANT\\_and\\_UK\\_BioBank\\_Meta-analysis\\_Summary\\_Statistics](https://portals.broadinstitute.org/collaboration/giant/index.php/GIANT_consortium_data_files#BMI_and_Height_GIANT_and_UK_BioBank_Meta-analysis_Summary_Statistics)
14. Paré G, Mao S, Deng WQ. A robust method to estimate regional polygenic correlation under misspecified linkage disequilibrium structure. *Genet Epidemiol* 2019; **42**: 636-647. DOI: 10.1002/gepi.22149.
15. Marees AT, de Kluiver H, Stringer S, *et al.* A tutorial on conducting genome-wide association studies: Quality control and statistical analysis. *Int J Methods Psychiatr Res* 2018; **27**: 1-10. DOI: 10.1002/mpr.1608.
16. Guo W, Key TJ, Reeves GK. Adiposity and breast cancer risk in postmenopausal women: Results from the UK Biobank prospective cohort. *Int J Cancer.* 2018;**143**(5):1037-1046. doi:10.1002/ijc.31394
17. Hemani G, Zheng J, Elsworth B *et al.* The MR-Base platform supports systematic causal inference across the human phenome. *eLife* 2018;**7**:e34408. doi: 10.7554/eLife.34408.
