# Supplementary material for: Surrogate Adiposity Markers and Mortality
Source: JAMA Netw Open. 2023 Sep 20;6(9):e2334836. doi: 10.1001/jamanetworkopen.2023.34836 (PMC10512100; doi:10.1001/jamanetworkopen.2023.34836)
Supplement: Supplement 2. — Data Sharing Statement [file jamanetwopen-e2334836-s002.pdf]

## Data Sharing Statement

Khan. Surrogate Adiposity Markers and Mortality Among White Adults. *JAMA Netw Open*. Published September 20, 2023. doi:10.1001/jamanetworkopen.2023.34836

### Data

**Data available:** Yes

**Data types:** Deidentified participant data

**How to access data:** Please find the link to the UK Biobank Data Showcase here:

<https://biobank.ndph.ox.ac.uk/showcase/> Email address to request access: [access@ukbiobank.ac.uk](mailto:access@ukbiobank.ac.uk)

**When available:** With publication

### Supporting Documents

**Document types:** None

### Additional Information

**Who can access the data:** Data will be made available for anyone requesting the data through the UK Biobank application process.

**Types of analyses:** Data will be made available for anyone requesting the data through the UK Biobank application process.

**Mechanisms of data availability:** Data will be made available for anyone requesting the data through the UK Biobank application process.

**Any additional restrictions:** All UK Biobank data from our study can be accessed through an application process that must be completed on the main UK Biobank website.
